# Supplementary material for: Thermal processes of thermokarst lakes in the continuous permafrost zone of northern Siberia – observations and modeling (Lena River Delta, Siberia)
Source: Copernicus journal article supplement (doi:10.5194/bg-12-5941-2015), 2015-10-19
Supplement: Supplementary file 1 [file bg-12-5941-2015-supplement.zip]

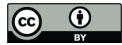

## *Supplement of*

# **Thermal processes of thermokarst lakes in the continuous permafrost zone of northern Siberia – observations and modeling (Lena River Delta, Siberia)**

**J. Boike et al.**

*Correspondence to:* J. Boike ([julia.boike@awi.de](mailto:julia.boike@awi.de))

- [bg-12-5941-2015-supplement-title-page.pdf](#)
- [20150106\\_Comments.txt](#)
- [Ku\\_Lake\\_1\\_2009\\_2010.csv](#)
- [LenaRiver2009\\_2010.csv](#)
- [Sa\\_Lake\\_1\\_2009\\_2012.csv](#)
- [Sa\\_Lake\\_1\\_2010-daily-color-.2s.gif](#)
- [Sa\\_Lake\\_2\\_2009\\_2012.csv](#)
- [Sa\\_Lake\\_3\\_2009\\_2010.csv](#)
- [Sa\\_Lake\\_4\\_2009\\_2010.csv](#)
- [Samoylov\\_2009\\_2012.csv](#)
- [meanlake\\_air\\_temp.txt](#)

The copyright of individual parts of the supplement might differ from the CC-BY 3.0 licence.
